# Supplementary material for: Synthesis, Characterization and Application of Polypyrrole Functionalized Nanocellulose for the Removal of Cr(VI) from Aqueous Solution
Source: MDPI journal article supplement (doi:10.3390/polym13213691), 2021-10-26
Supplement: s1 [file s1]

## Supplementary Material

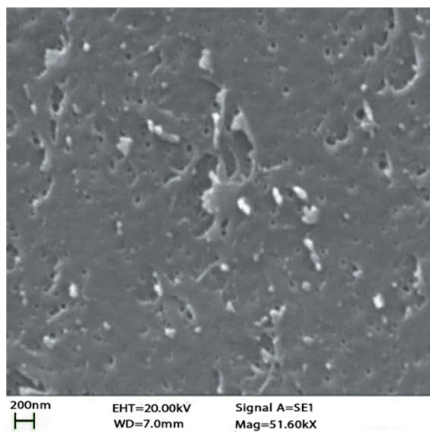

Figure S1. SEM image of nanocellulose.

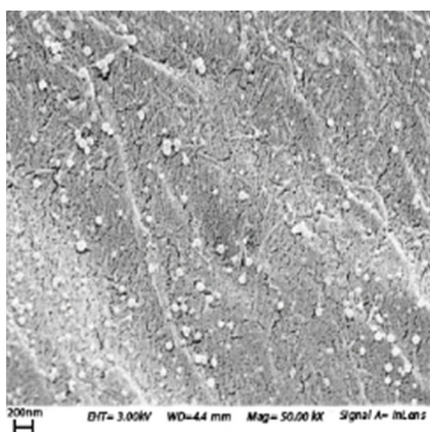

Figure S2. SEM image of ppy/NC nanocomposite after Cr(VI) ions adsorption.
